# Supplementary material
Source: HighWire-hosted journal article supplement (https://bjgpopen.org/highwire/filestream/4889/field_highwire_adjunct_files/0/vD_BJGPO.2021.0177_Supp.pdf)
Supplement: vD_BJGPO.2021.0177_Supp.pdf [file vD_BJGPO.2021.0177_Supp.pdf]

Supplementary Appendix S1. Nierpas (kidney passport) information

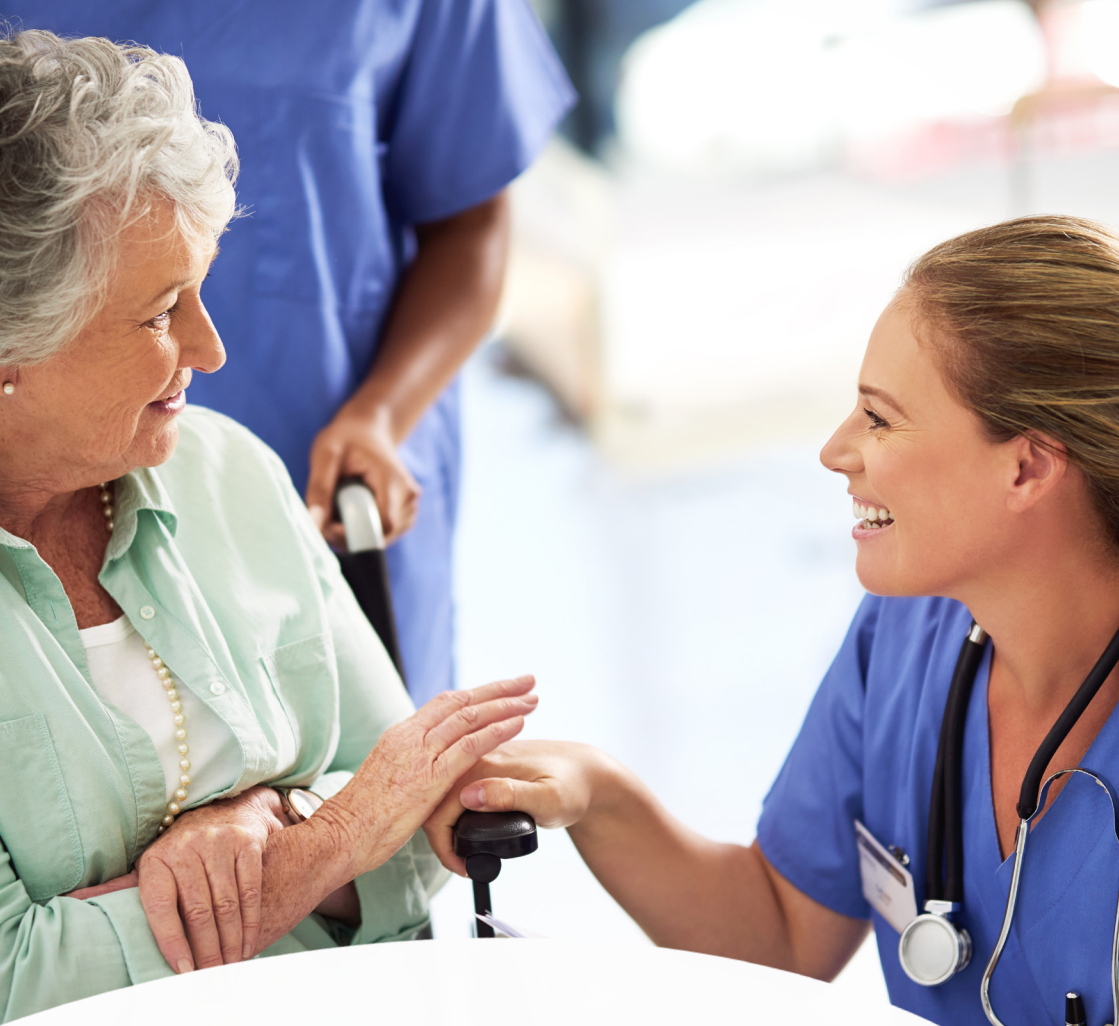

**Nierpas**

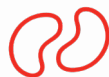

**NIERSTICHTING**

Leven gaat voor.

*Deze Nierpas bevat gegevens over uw gezondheid. Gegevens over uw gezondheid zijn gevoelige persoonsgegevens. Daarom is het belangrijk dat u de juiste zorgvuldigheid in acht neemt en de Nierpas niet door anderen laat kopiëren, scannen of fotograferen. U kan de Nierpas aan anderen laten zien als u deze personen vertrouwd. U bent dus zelf verantwoordelijk voor het niet verspreiden van de inhoud van dit document.*

# Inhoud

|                                                       |    |
|-------------------------------------------------------|----|
| Mijn nierpas                                          | 4  |
| Mijn persoonlijke gegevens                            | 5  |
| De werking van mijn nieren                            | 6  |
| Wat is chronische nierschade?                         | 8  |
| De oorzaken van mijn chronische nierschade            | 10 |
| Mijn chronische nierschade behandelen                 | 11 |
| Mijn controles                                        | 12 |
| Mijn persoonlijke doelen                              | 16 |
| Wat kan ik zelf doen om mijn nieren gezond te houden? | 18 |
| Mijn afspraak voorbereiden                            | 21 |
| Woordenlijst                                          | 22 |

## **Mijn nierpas**

Uw nierpas is een persoonlijk document waarin u uw gegevens over uw chronische nierschade kunt bijhouden. De nierpas helpt u, uw huisarts en andere hulpverleners overzicht te houden over al uw bloedwaarden en andere controles. Ook vindt u de waarden die goed voor u zijn (streefwaarden) terug in deze nierpas. Uw streefwaarden zijn afgesproken met uw behandelaar (internist-nefroloog en/of huisarts, praktijkondersteuner).

Neem uw nierpas mee bij uw controles en vraag uw behandelaar deze pas in te vullen.

De nierpas bevat ook uitleg over chronische nierschade en uitleg over de gegevens die verzameld worden bij de controles.

## Mijn persoonlijke gegevens

Naam .....

Telefoon .....

E-mailadres .....

### Mijn huisarts

Naam .....

Telefoon .....

E-mailadres .....

### Mijn praktijkondersteuner (POH)

Naam .....

Telefoon .....

E-mailadres .....

### Mijn internist/nefroloog

Naam .....

Telefoon .....

E-mailadres .....

### Mijn apotheek

Naam .....

Telefoon .....

E-mailadres .....

### Mijn diëtist

Naam .....

Telefoon .....

E-mailadres .....

# De werking van mijn nieren

Een mens heeft twee nieren. Nieren zitten aan de rugzijde van het lichaam, achter de onderste ribben, links en rechts van de wervelkolom.

## Nieren en urinewegen

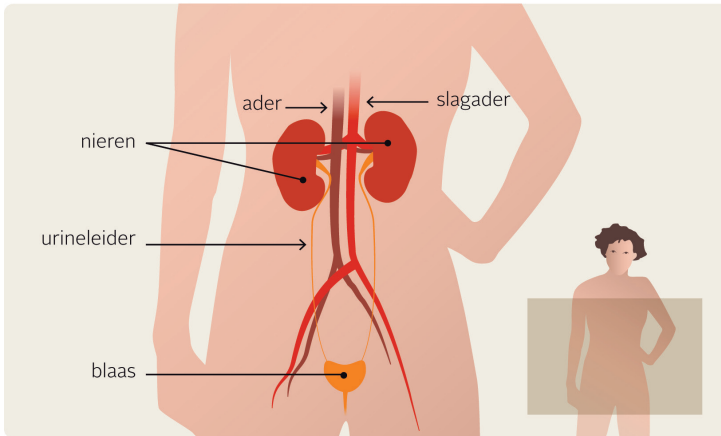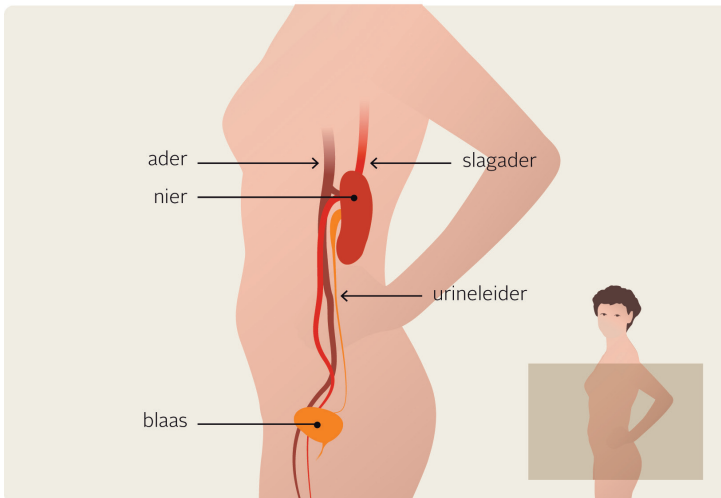

Nieren hebben verschillende belangrijke taken:

### De functies van nieren



- Zuiveren van het bloed**  
Nieren verwijderen overtollige (afval)stoffen zoals zouten, ureum (afvalproduct eiwitstofwisseling), kreatinine (afbraakproduct van spieren) en afbraakproducten van hormonen. Daarnaast verwijderen nieren lichaamsvreemde stoffen zoals medicijnen.
- Regelen van de vocht- en zoutbalans**  
Nieren regelen de bloeddruk. Een ingenieus proces waarbij ook het zenuwstelsel, bijnieren, hart en bloedvaten betrokken zijn. Nieren bewaken hierbij de balans tussen zouten (natrium, kalium en chloor) en water.
- Regelen van de zuurgraad (pH) in het bloed**  
Nieren zijn verantwoordelijk voor de zuurgraad in het bloed, wat belangrijk is voor het functioneren van lichaamscellen.
- Helpen bij de botopbouw**  
Voor een goede botopbouw is de balans tussen calcium en fosfaat van belang. Nieren zetten vitamine D om in een actieve vorm die er voor zorgt dat calcium beter wordt opgenomen uit de darmen. Ook reguleren nieren de fosfaatuitscheiding.
- Produceren van een aantal hormonen**  
Nieren produceren onder andere het hormoon EPO (erythropoëetine), een stof die de vorming van rode bloedlichaampjes in het beenmerg bevordert. Rode bloedlichaampjes zorgen voor het transport van zuurstof in het bloed. Ook produceren nieren hormonen die belangrijk zijn voor het regelen van de bloeddruk, zoals renine.

© Maaike Wijnands / Nierstichting



## Wat is chronische nierschade?

Chronische nierschade betekent dat de nieren langdurig onvoldoende werken (chronisch betekent langdurig). Er is dan schade aan het nierweefsel.

Chronische nierschade is meestal blijvend. Nierfilters die eenmaal beschadigd zijn, kunnen zich niet meer herstellen. Door de nierschade ontstaan allerlei problemen. Onder andere met het filteren van het bloed. Ook kunnen er eiwitten door de nierfilters heen lekken.

- De nieren kunnen minder bloed per minuut filteren. Oftewel: de nierfunctie is verminderd. Daardoor blijven er meer afvalstoffen achter in het bloed. Hoe slechter de nierfunctie, hoe meer afvalstoffen zich in het lichaam ophopen.
- De nierfilters laten stoffen door die in het bloed moeten blijven. Eiwitten lekken erdoorheen en komen in de urine terecht.
- De beschadigde nieren zijn minder goed in staat om de bloeddruk te regelen. De bloeddruk gaat dan omhoog. Daardoor komt er meer druk op de nierfilters te staan. Die raken dan nog verder beschadigd.

Beschadigde nierfilters doen hun werk niet goed meer. De gezonde nierfilters reageren hierop door harder te werken. In het begin lukt dat ook. Maar de nierfilters slijten wel eerder. Zo raken steeds meer nierfilters beschadigd. Hierdoor gaan de nieren steeds verder achteruit.

De nierschade is niet bij iedereen even erg. Bij sommige mensen is de nierfunctie licht verminderd. Bij anderen werken de nieren nauwelijks nog en blijven er veel afvalstoffen in het bloed achter. Het tempo waarin de nieren achteruit gaan, verschilt ook per persoon.

De beginfase van chronische nierschade gaat vaak onopgemerkt voorbij. Mensen zijn zich er niet van bewust dat zij deze aandoening hebben omdat er geen tot weinig klachten zijn. Maar chronische nierschade is onomkeerbaar en kan ernstige gevolgen hebben.

Klachten ontstaan vaak pas als de nieren sterk achteruit zijn gegaan en de werking nog maar 30% of minder is. Een nierfunctie-  
vervangende behandeling zoals dialyse of niertransplantatie is over het algemeen nodig als de nierfunctie ongeveer 10% is.

### Achteruitgang nierfunctie en eerste klachten

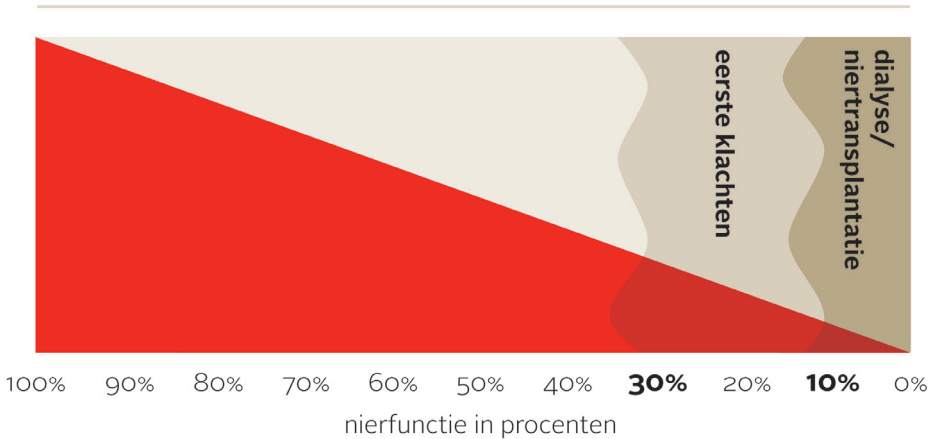

# De oorzaken van mijn chronische nierschade

## Nierstenen

Ontstaan wanneer er teveel moeilijk oplosbare zouten en mineralen in de urine zitten.

## Suikerziekte

Door diabetes beschadigen kleine aanvoerende bloedvatjes in de nier waardoor nierschade ontstaat.

## Erfelijke nierziekten

Zoals de ziekte van Alport of Cystenieren.

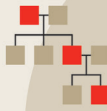

## Hoge bloeddruk

Beschadigt de bloedvaten en nierfilters.

## Nierbekkenontsteking

Kan ontstaan door het terugstromen van urine van uit de blaas naar het nierbekken. Wanneer dit vaak gebeurt, kan chronische nierschade ontstaan.

## Aderverkalking

Zorgt voor toenemende vernauwing van slagaders door verharding van het weefsel.

## Nierfilterontsteking

Beschadiging van de nierfilters door een ziekte elders in het lichaam of door een aandoening van de nier zelf.

Bij mij is de oorzaak van de nierschade:

.....

.....

.....

.....

.....

.....

.....

.....

Meer informatie over de werking van de nieren en over de oorzaken van nierschade kunt u terugvinden op [www.nieren.nl](http://www.nieren.nl). Zoek dan op 'werking nieren' en 'oorzaak nierschade'

## Mijn chronische nierschade behandelen

De behandeling van nierschade moet ervoor zorgen dat de nierschade beperkt blijft en dat de nierfunctie zo stabiel mogelijk blijft. Huisartsen en specialisten hebben duidelijke afspraken gemaakt over welke behandeling wanneer nodig is (NHG Standaard Chronische Nierschade 2018). Als u ouder wordt, neemt uw nierfunctie langzaam af. Net zoals dat met andere lichaamsfuncties gebeurt.

De nierfunctie gaat te snel achteruit bij:

- een daling van de nierfunctie (eGFR) van meer dan 5 punten per jaar of een daling van 25% in 5 jaar
- of
- als er toenemend te veel eiwitten in de urine zitten (meer dan 30 mg/mmol).

Als de nierfunctie (te snel) achteruit gaat kan de huisarts uw medicijnen aanpassen of contact opnemen met de internist of nefroloog in het ziekenhuis. Deze arts kan meedenken over wat er moet gebeuren om ervoor te zorgen dat de nierfunctie niet verder achteruit gaat.

Het behandelen van een hoge bloeddruk is het belangrijkste om te voorkomen dat de nieren achteruit gaan. Vraag uw behandelaar welke maatregelen of medicijnen er naast de controles, bij u nodig zijn om de nierschade beperkt te houden.

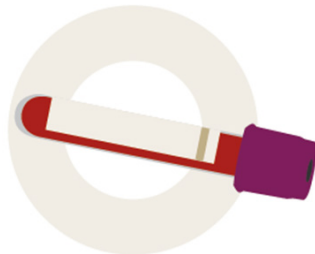

## Mijn controles

| Wat moet er gecontroleerd worden? (doorhalen wat niet van toepassing is)                                        | Normaal waarden                      | Mijn streef-waarden | Aantal con-troles per jaar |
|-----------------------------------------------------------------------------------------------------------------|--------------------------------------|---------------------|----------------------------|
| Nierschade                                                                                                      |                                      |                     |                            |
| Klaring - nierfunctie (eGFR in ml/minuut/1,73m <sup>2</sup> )                                                   | > 60                                 |                     |                            |
| Creatinine (mmol/l)                                                                                             | mannen<br>45-100<br>Vrouwen<br>45-80 |                     |                            |
| Eiwit in de urine:<br>Albumine-Creatinine-ratio in mg/mmol                                                      | <3                                   |                     |                            |
| Bloeddruk                                                                                                       |                                      |                     |                            |
| Bloeddruk (mmHg)                                                                                                | <130/80                              |                     |                            |
| Leefstijl                                                                                                       |                                      |                     |                            |
| Gewicht (kg)                                                                                                    |                                      |                     |                            |
| Body Mass Index (BMI)                                                                                           | 20-25                                |                     |                            |
| Zout in voeding (gram per dag). Zelf uit te rekenen op <a href="http://www.zoutmeter.com">www.zoutmeter.com</a> | < 6                                  |                     |                            |
| Aantal sigaretten per dag                                                                                       |                                      |                     |                            |
| Bloedglucose (nuchter geprikt)                                                                                  |                                      |                     |                            |
| Bloedglucose (mmol/l)                                                                                           | < 6.0                                |                     |                            |
| Lange termijn bloedglucose (HbA1C)                                                                              | < 53                                 |                     |                            |

< betekent: minder dan

> betekent: meer dan

| Wat moet er gecontroleerd worden? (doorhalen wat niet van toepassing is)                                        | 1 <sup>e</sup> controle | 2 <sup>e</sup> controle | 3 <sup>e</sup> controle | 4 <sup>e</sup> controle |
|-----------------------------------------------------------------------------------------------------------------|-------------------------|-------------------------|-------------------------|-------------------------|
| Nierschade                                                                                                      |                         |                         |                         |                         |
| Klaring - nierfunctie (eGFR in ml/minuut/1,73m <sup>2</sup> )                                                   |                         |                         |                         |                         |
| Creatinine (mmol/l)                                                                                             |                         |                         |                         |                         |
| Eiwit in de urine: Albumine-Creatinine-ratio in mg/mmol                                                         |                         |                         |                         |                         |
| Bloeddruk                                                                                                       |                         |                         |                         |                         |
| Bloeddruk (mmHg)                                                                                                |                         |                         |                         |                         |
| Leefstijl                                                                                                       |                         |                         |                         |                         |
| Gewicht (kg)                                                                                                    |                         |                         |                         |                         |
| Body Mass Index (BMI)                                                                                           |                         |                         |                         |                         |
| Zout in voeding (gram per dag). Zelf uit te rekenen op <a href="http://www.zoutmeter.com">www.zoutmeter.com</a> |                         |                         |                         |                         |
| Aantal sigaretten per dag                                                                                       |                         |                         |                         |                         |
| Bloedglucose (nuchter geprikt)                                                                                  |                         |                         |                         |                         |
| Bloedglucose (mmol/l)                                                                                           |                         |                         |                         |                         |
| Lange termijn bloedglucose (HbA1C)                                                                              |                         |                         |                         |                         |

< betekent: minder dan

> betekent: meer dan

| Wat moet er gecontroleerd worden? (doorhalen wat niet van toepassing is) | Normaal waarden | Mijn streef-waarden | Aantal con-troles per jaar |
|--------------------------------------------------------------------------|-----------------|---------------------|----------------------------|
|--------------------------------------------------------------------------|-----------------|---------------------|----------------------------|

|        |  |  |  |
|--------|--|--|--|
| Vetten |  |  |  |
|--------|--|--|--|

|                                  |           |  |  |
|----------------------------------|-----------|--|--|
| Totaal Cholesterol (TC) (mmol/l) | < 6.5     |  |  |
| LDL cholesterol (mmol/l)         | < 2.5     |  |  |
| HDL cholesterol (mmol/l)         | > 1.0     |  |  |
| TC/HDL ratio                     | 4.0 - 8.0 |  |  |

|                      |  |  |  |
|----------------------|--|--|--|
| Overige bloedwaarden |  |  |  |
|----------------------|--|--|--|

|                           |                                               |  |  |
|---------------------------|-----------------------------------------------|--|--|
| Kalium (mmol/l)           | 3.5 - 5.0                                     |  |  |
| Calcium (mmol/l)          | 2.1 - 2.55                                    |  |  |
| Fosfaat (mmol/l)          | 0.9 - 1.55                                    |  |  |
| PTH (pmol/l)              | 2.0 - 7.0                                     |  |  |
| Hemoglobine – HB (mmol/l) | 8.5 - 11 man-<br>nen<br>7.5 - 10 vrou-<br>wen |  |  |

|                |  |  |  |
|----------------|--|--|--|
| Extra metingen |  |  |  |
|----------------|--|--|--|

|                                      |  |  |  |
|--------------------------------------|--|--|--|
| Zoutuitscheiding in urine per 24 uur |  |  |  |
|--------------------------------------|--|--|--|

| Wat moet er gecontroleerd worden? (doorhalen wat niet van toepassing is) | 1 <sup>e</sup> controle | 2 <sup>e</sup> controle | 3 <sup>e</sup> controle | 4 <sup>e</sup> controle |
|--------------------------------------------------------------------------|-------------------------|-------------------------|-------------------------|-------------------------|
|--------------------------------------------------------------------------|-------------------------|-------------------------|-------------------------|-------------------------|

| Vetten                           |  |  |  |  |
|----------------------------------|--|--|--|--|
| Totaal Cholesterol (TC) (mmol/l) |  |  |  |  |
| LDL cholesterol (mmol/l)         |  |  |  |  |
| HDL cholesterol (mmol/l)         |  |  |  |  |
| TC/HDL ratio                     |  |  |  |  |

| Overige bloedwaarden      |  |  |  |  |
|---------------------------|--|--|--|--|
| Kalium (mmol/l)           |  |  |  |  |
| Calcium (mmol/l)          |  |  |  |  |
| Fosfaat (mmol/l)          |  |  |  |  |
| PTH (pmol/l)              |  |  |  |  |
| Hemoglobine – HB (mmol/l) |  |  |  |  |

| Extra metingen                       |  |  |  |  |
|--------------------------------------|--|--|--|--|
| Zoutuitscheiding in urine per 24 uur |  |  |  |  |







## Wat kan ik zelf doen om mijn nieren gezond te houden?

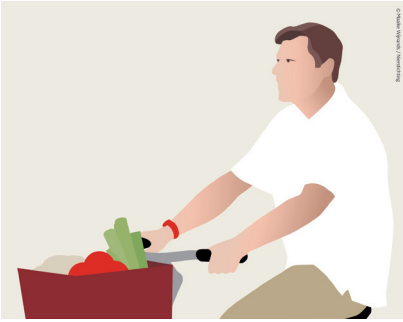

### Leef zo gezond mogelijk

Rook niet, probeer minimaal 30 minuten matig-intensieve te bewegen per dag, houdt een gezond gewicht, eet gezond en beperk uw alcohol zo veel mogelijk.

### Minder zout eten

Bijna iedereen in Nederland eet te veel zout. U waarschijnlijk ook. Zout is slecht voor de nieren. Minder zout eten bereikt u door geen extra zout aan uw eten toe te voegen en te letten op producten met verborgen zout zoals kant-en-klaarmaaltijden. Hoeveel zout eet u? U kunt alleen of samen met uw behandelaar de Zoutmeter invullen op: [www.zoutmeter.com](http://www.zoutmeter.com).

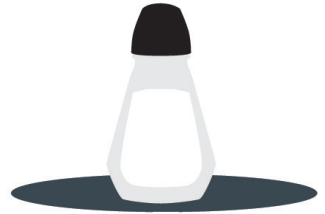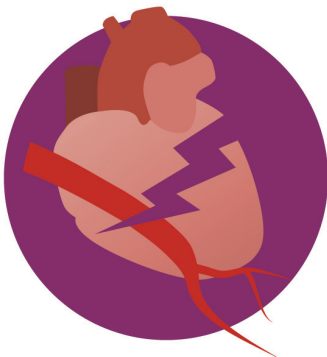

### Drink voldoende

Drink in ieder geval 1,5 liter en bij warm weer of veel vochtverlies 2 liter. Hebt u hartfalen? Vraag dan uw behandelaar hoeveel u het beste kunt drinken.

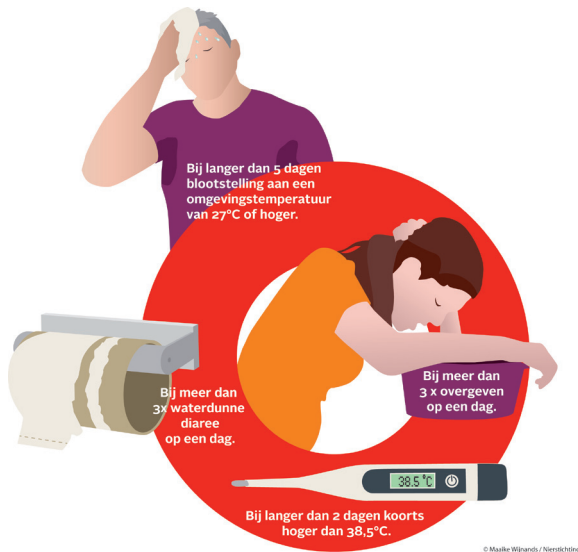

## Voorkom vochtverlies

Uw nieren werken minder goed als u veel vocht verliest. Neem daarom contact op met uw huisarts als u moet braken, diarree heeft en/of koorts en als het meer dan 5 dagen warm weer is. Het kan zijn dat de huisarts u adviseert uw plastabletten, bloeddrukmedicijnen of diabetestabletten enkele keren over te slaan.

## Gebruik paracetamol als u pijn heeft

Andere pijnstillers (zoals ibuprofen, naproxen of diclofenac) kunnen uw nieren beschadigen, waardoor uw nierfunctie flink kan verminderen. Helpt paracetamol onvoldoende? Overleg dan met uw arts.

## Neem uw medicijnen zorgvuldig in

Zorg voor een vast systeem. Controleer de doosjes en bekijk hoe u de medicijnen dient te gebruiken. Neem contact op met uw huisarts of uw apotheker als u een vraag heeft over uw medicijnen.

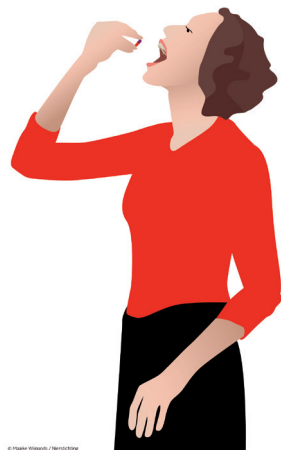

## Laat weten dat u nierschade heeft

Vertel uw apotheker of dienstdoende arts (huisartsenpost) dat u nierschade heeft en laat deze pas zien.

Vraag aan uw apotheker een actueel medicatie overzicht bij iedere wijziging van uw medicijnen. U kunt dit overzicht bewaren in deze pas en meenemen naar iedere controle bij de arts of praktijkondersteuner.

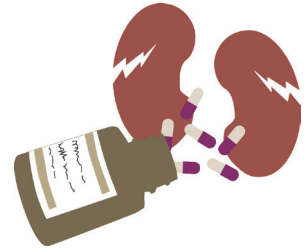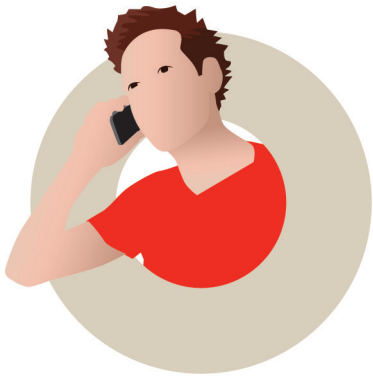

Meer informatie over een gezonde leefstijl, gezonde voeding en medicijnen kunt u lezen op [www.nieren.nl](http://www.nieren.nl).

Zoek dan op 'leefstijl', 'voeding' of 'medicijnen'.

Verder kunt u de brochure "Medicijnen voor nierpatiënten, zo gebruikt u ze" van de Nierstichting lezen voor meer informatie over medicijnen.

## Mijn afspraak voorbereiden

U heeft een paar keer per jaar contact met uw behandelaar over uw nierschade. Het helpt als u weet wat u wilt bespreken. Bereid het gesprek daarom goed voor. Uw behandelaar vindt dat ook prettig.

Hieronder een paar vragen die u kunnen helpen bij het voorbereiden.

- Wat verwacht u van het gesprek? Meld uw verwachting aan het begin van de afspraak met uw arts behandelaar. Die kan dan meteen aangeven of uw verwachting redelijk is.
- Welke onderwerpen wilt u bespreken? Wat wilt u graag weten? Misschien hebt u vragen over de behandelmogelijkheden. Of misschien wilt u weten of uw klachten bijwerkingen kunnen zijn.
- Wat zijn uw zorgen en twijfels? Misschien maakt u zich zorgen over uw nierfunctie. Of over het combineren van de behandeling en zorgtaken in thuis.
- Wat is voor u belangrijk in uw leven, naast uw lichamelijke gezondheid? Denk bijvoorbeeld aan (vrijwilligers)werk en sociale activiteiten. Als een behandeling hier invloed op heeft, kan dit meewegen in de afweging of die behandeling optimaal voor u is.

Voor meer informatie kijk op [www.nieren.nl](http://www.nieren.nl) en zoek op 'gesprek'.

## Woordenlijst

(in alfabetische volgorde)

### Bloeddruk

Bij hoge bloeddruk (hypertensie) staat er te veel druk op de bloedvaten. Die kunnen dan beschadigd raken. Dat is slecht voor de nieren en vergroot de kans op hart- en vaatziekten, zoals een hartinfarct of een beroerte. De bloeddruk is dus een risicofactor voor hart- en vaatziekte. Het is belangrijk om de bloeddruk regelmatig te controleren. Soms zijn er meerdere medicijnen nodig om de hoge bloeddruk te behandelen. Minder zout eten helpt om de bloeddruk te verlagen. Hoe beter uw bloeddruk, hoe beter dat is voor uw nieren.

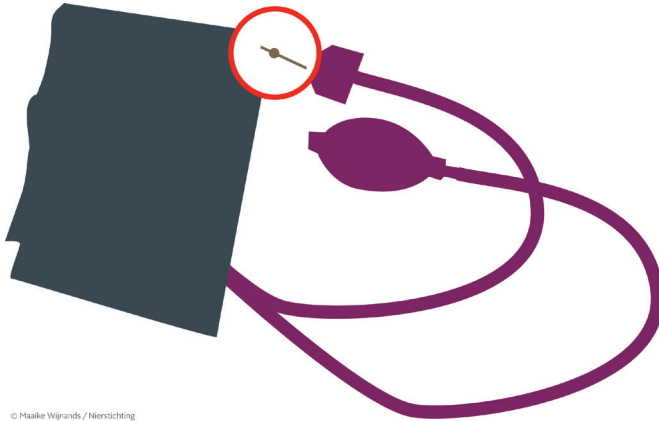

© Maaike Wijbrands / Niersichting

### Bloedglucose

Te hoge bloedglucose (bloedsuiker) waarden kan betekenen dat u diabetes (suikerziekte) hebt. Veel mensen met diabetes hebben ook nierschade. Door te hoge bloedglucose waarden kan nierschade ontstaan en ook verergeren.

## BMI

Bij chronische nierschade is het belangrijk dat u een gezond gewicht hebt. Overgewicht is niet goed, maar een te laag gewicht ook niet. Zowel een te hoog als een te laag gewicht geven een hoger risico op hart- en vaatziekten. Of u een gezond gewicht hebt, meten zorgverleners met uw Body Mass Index (BMI). Uw BMI zegt iets over uw gewicht in verhouding tot uw lichaamslengte. De BMI wordt berekend met een speciale rekensom namelijk:  $\text{Gewicht (in kilogram)} ; (\text{Lengte (in meters)} \times \text{Lengte (in meters)})$ . Bij een gezond gewicht ligt de BMI tussen 18,5 en 25. Is uw BMI meer dan 25, dan heeft u overgewicht. Is uw BMI minder dan 18,5, dan heeft u ondergewicht. Als de grenzen voor u anders liggen, bespreekt uw arts dat met u. Heeft u overgewicht? Dan heeft afvallen een positief effect. Ook een klein beetje afvallen zorgt al voor minder kans op hart- en vaatziekten.

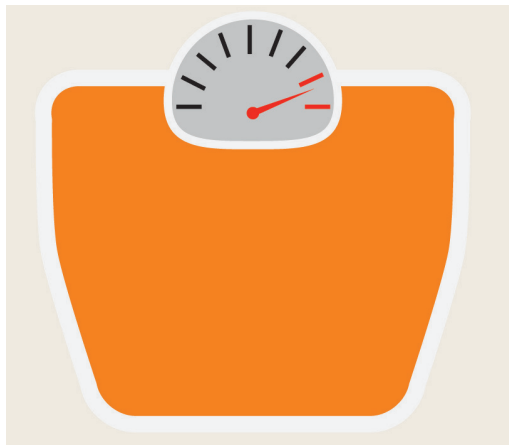

## Cholesterol

Cholesterol is een belangrijke vetachtige stof voor het lichaam. Er zijn verschillende soorten cholesterol: HDL-cholesterol en LDL-cholesterol. Veel LDL-cholesterol in uw bloed is niet gezond. Het kan zorgen dat uw bloedvaten dichtslibben. U hebt dan meer kans op het krijgen van hart- of vaatziekten.



## Klaring (eGFR, Creatinine)

Klaring wil zeggen hoe goed de nieren afvalstoffen uit het bloed kunnen filteren. Dit wordt ook wel nierfunctie genoemd. De klaring is nog genoeg als de nieren 60 ml per minuut filteren. Dit wordt bepaald door de hoogte van het creatinine in het bloed te meten. Creatinine is een afvalstof van de spieren, die voortdurend wordt afgegeven aan het bloed. De nieren filteren een deel ervan uit het bloed (klaring). Daardoor is de hoeveelheid creatinine in het bloed van gezonde mensen steeds ongeveer gelijk. De hoeveelheid verschilt wel per persoon, omdat die afhankelijk is van de spiermassa. Zo heeft een mannelijke bodybuilder een hogere creatiniewaarde in het bloed dan een tengere vrouw. Als de nieren niet meer goed werken, lukt het verwijderen van creatinine minder goed. Dan wordt de hoeveelheid creatinine in het bloed hoger en de klaring dus minder.

## Eiwitten in de urine

Normaal zitten er geen eiwitten in de urine. Bij mensen zonder nierproblemen zorgen de nierfilters ervoor dat de eiwitten in het bloed blijven. Maar bij nierschade kunnen er toch eiwitten door de nierfilters lekken. Die komen dan in de urine terecht. De hoeveelheid eiwitten in de urine wordt weergegeven in de verhouding Albumine/Creatinine. Deze stoffen worden gemeten in de urine. Een verhouding groter dan 3 geldt als matig verhoogde - en een verhouding boven 30 als ernstig verhoogde hoeveelheid eiwitten in de urine.

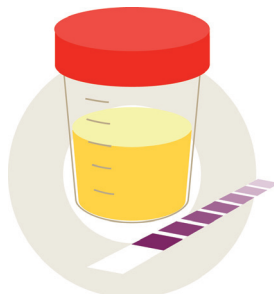

© Maaiké Wijnands / Nierstichting

## Hart- en vaatziekten

Hart- en vaatziekten zijn aandoeningen waarbij de conditie van het hart of de bloedvaten minder goed is. Aderverkalking en adervernauwing zijn voorbeelden van hart- en vaatziekten. Maar ook ernstigere ziektes zoals een hartinfarct of een herseninfarct horen bij de groep hart- en vaatziekten. Nierschade, hoge bloeddruk en diabetes geven een verhoogde kans op het krijgen van hart- en vaatziekten.

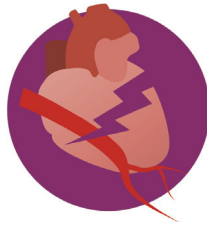

## Kalium

Kalium is een mineraal. Kalium speelt een belangrijke rol bij het geleiden van zenuwprikkels, zodat spieren zich kunnen samentrekken. Verder is kalium betrokken bij het regelen van de bloeddruk en bij de juiste hoeveelheid vocht in het lichaam. Gezonde mensen plassen het kalium dat ze binnenkrijgen weer uit. De nieren halen kalium namelijk uit het bloed. Bij nierschade lukt dat minder goed. Er blijft dan te veel kalium in het lichaam achter. Kalium in het bloed kan ook te hoog worden door medicijnen. Het is daarom belangrijk dat dit regelmatig gecontroleerd wordt.

## Normaalwaarden en streefwaarden

Er is een verschil tussen normaalwaarden en streefwaarden. Normaalwaarden zijn de uitkomsten van metingen zoals die bij het merendeel van de mensen in Nederland voorkomen. Streefwaarden zijn de waarden die voor u meest optimaal zijn om uw nieren, hart en bloedvaten te beschermen. Uw streefwaarden zijn afhankelijk van uw persoonlijke conditie, de ernst van de nierschade, de oorzaak van uw nierschade en uw leeftijd. Als uw nieren verder achteruit gaan, dan kunnen ook uw streefwaarden veranderen.

## Nuchter geprikt

Als u nuchter bloed moeten laten prikken betekent het dat u minimaal 8 uur voor het bloedprikken niets meer mag eten en drinken. Het drinken van water of thee (zonder toevoegingen) mag wel.

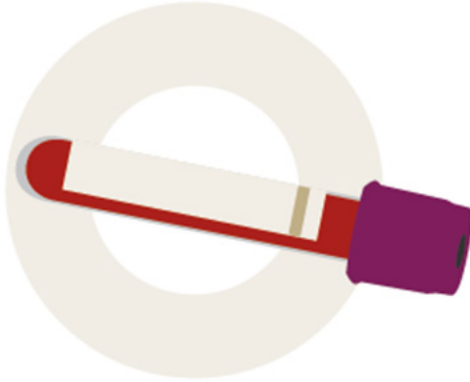

## Roken

Roken zorgt voor een snellere achteruitgang van de nierfunctie. Dit komt doordat de bloedvaten in en naar de nieren beschadigd raken door roken. Maar ook omdat door het roken de bloeddruk omhoog gaat. Daarnaast is bekend dat bij rokers de nierfilters meer eiwit blijven lekken dan bij mensen die gestopt zijn met roken. Door roken stijgt ook het risico op hart- en vaatziekten. Als u wilt stoppen met roken kunt u altijd om een afspraak vragen bij de praktijkverpleegkundige van uw huisarts, deze kan u hierbij helpen.

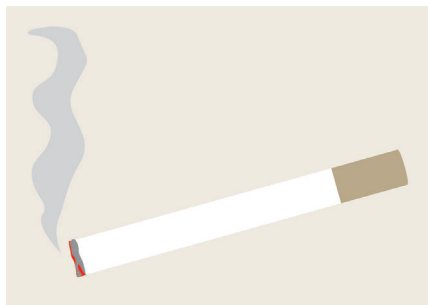

## Zout in voeding

Te veel zout eten verhoogt de bloeddruk en daarmee het risico op nierschade en hart- en vaatziekten. Maar te veel zout heeft ook een schadelijk effect direct op de nieren. Zelfs als de bloeddruk goed is, kunnen er schadelijke effecten optreden door het gebruik van te veel zout. Daarnaast kan te veel zoutgebruik ervoor zorgen dat bloeddrukmedicijnen minder goed werken. De gezondheidsraad adviseert daarom om niet meer dan 6 gram zout per dag te eten. Het meeste zout dat we eten (80%) komt uit producten die we kopen in de supermarkt, slechts 20% strooien we zelf met het zoutvatje. Producten die erg veel zout bevatten zijn pakjes en zakjes, smaakmakers (zoals kruidenmixen en bouillon), soepen en sauzen uit blik en kant-en-klaar maaltijden. Hoeveel zout eet u? Vul de Zoutmeter in van de Nierstichting: [www.zoutmeter.com](http://www.zoutmeter.com).

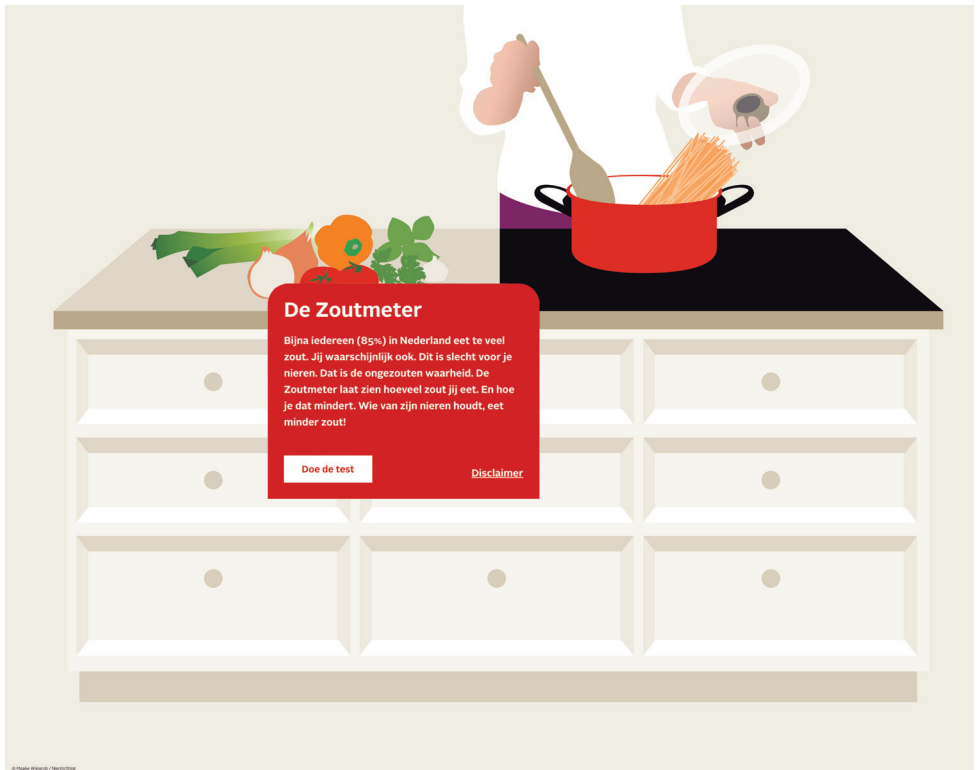

**De Zoutmeter**

Bijna iedereen (85%) in Nederland eet te veel zout. Jij waarschijnlijk ook. Dit is slecht voor je nieren. Dat is de ongezouten waarheid. De Zoutmeter laat zien hoeveel zout jij eet. En hoe je dat mindert. Wie van zijn nieren houdt, eet minder zout!

[Doe de test](#) [Disclaimer](#)

© Hester Wijnand / HesterWijng

## **Nierstichting**

Postbus 2020

1400 DA Bussum

Algemeen 035 697 80 00

Informatie nieren en nierziekten:

0800 388 00 00 (gratis)

infonierziekten@nierstichting.nl

**www.nierstichting.nl**

Meer informatie over chronische nierschade kunt u vinden op [www.nieren.nl](http://www.nieren.nl) en op [www.thuisarts.nl](http://www.thuisarts.nl).

De nierpas is ontwikkeld in het kader van de EBACKD studie. Een samenwerking tussen het Radboudumc en het Canisius Wilhelmina Ziekenhuis, te Nijmegen. Deze nierpas is mede mogelijk gemaakt door de Nierstichting.

---

Disclaimer De informatie in deze brochure is met grote zorg samengesteld. Nierstichting Nederland kan geen enkele aansprakelijkheid aanvaarden voor de juistheid of volledigheid van de inhoud van de brochure. Nierstichting Nederland is niet verantwoordelijk voor de informatie van derden waarnaar in deze brochure wordt verwezen. Het copyright van tekst- en beeldmateriaal in deze folder behoort aan Nierstichting Nederland.

---

*Het format van de nierpas is ontleend aan de Diabetes pas, ontwikkeld door de Diabetes Federatie Nederland.*

**1) Information about the internist/nephrologist**

**This section of the questionnaire is about the information you received from the doctor or nurse at the hospital. Please tick the answer that is most relevant to you.**

1.1) The information I received from my doctor in the hospital about the cause of my kidney disease was clear to me.

| Strongly disagree | Disagree | Neither agree nor disagree | Agree | Strongly agree |
|-------------------|----------|----------------------------|-------|----------------|
|                   |          |                            |       |                |

Can you name at least one aspect that you were satisfied with when the doctor talked to you about the cause of your kidney disease?

.....

.....

Can you name at least one point for improvement for the doctor when it comes to educating patients about the cause of kidney disease?

.....

.....

1.2) The information I received from my doctor in the hospital about the treatment of my kidney disease was clear to me.

| Strongly disagree | Disagree | Neither agree nor disagree | Agree | Strongly agree |
|-------------------|----------|----------------------------|-------|----------------|
|                   |          |                            |       |                |

Can you name at least one aspect that you were satisfied with when the doctor talked to you about the treatment of kidney disease?

.....

.....

Can you name at least one point for improvement for the doctor when it comes to talking about the treatment you received?

.....

.....

1.3) When I was referred back to the doctor, I was satisfactorily informed about the doctor's tasks in terms of controlling my kidney disease.

| Strongly disagree | Disagree | Neither agree nor disagree | Agree | Strongly agree |
|-------------------|----------|----------------------------|-------|----------------|
|                   |          |                            |       |                |

Can you name at least one aspect you were satisfied with?

.....

.....

Can you name at least one point for improvement?

.....

.....

1.4) I have other comments or points for improvement concerning the information I received from the doctor in the hospital before I was referred back to the General Practitioner.

|     |    |
|-----|----|
| Yes | No |
|-----|----|

|  |  |
|--|--|
|  |  |
|--|--|

If you answered yes, please share your comments or points for improvement below.

.....

.....

**2) Information in the kidney passport**

**This section of the questionnaire is about the kidney passport you received from the doctor in the hospital when you were referred back. Please tick the answer that is most relevant to you.**

2.1) I checked the kidney passport at home

| Yes | No |
|-----|----|
|     |    |

If not, what prevented you from checking the kidney pass?

.....

.....

2.2) I used the kidney passport during my check-ups with the doctor.

| Yes | No |
|-----|----|
|     |    |

If you answered yes, do you have at least one area of improvement for the kidney passport in terms of its use during check-ups?

.....

.....



If you answered no, what prevented you from using the kidney passport during the check-ups?

.....

.....

2.3) I think the kidney passport is a useful aid.

| Strongly disagree | Disagree | Neither agree nor disagree | Agree | Strongly agree |
|-------------------|----------|----------------------------|-------|----------------|
|                   |          |                            |       |                |

Can you name at least one aspect of the kidney passport that you were satisfied with?

.....

.....

Can you name at least one point of improvement concerning the kidney passport?

.....

.....

2.4) I have other comments or points for of improvement concerning the kidney passport.

| Yes | No |
|-----|----|
|     |    |

If you answered yes, please share your comments or points for improvement below.

.....

.....

**3) Checks by the General Practitioner**

**This part of the questionnaire is about how the General Practitioner monitored your kidney disease. Please tick the answer that is most relevant to you.**

3.1) The General Practitioner carried out the check-ups as recorded by the nephrologist

| Yes | No | I don't know |
|-----|----|--------------|
|     |    |              |

If you answered no, what did the doctor do differently and do you know why?

.....

.....

3.2) I had to remind the General Practitioner of the check-ups that were agreed between me and the hospital.

| Yes | No |
|-----|----|
|     |    |

If you answered yes, what exactly did you have to remind the doctor of?

.....

.....

3.3) I have more comments or points for improvement about the kidney disease check-ups by the General Practitioner.

| Yes | No |
|-----|----|
|     |    |

If you answered yes, please share your comments or points for improvement below.

.....

.....

**4) Collaboration between the General Practitioner and the internist/nephrologist.**

**This part of the questionnaire is about the collaboration between the General Practitioner and your hospital doctor. Please tick the answer that is most relevant to you.**

4.1) At the moment, my kidney disease is being monitored by ...

|                          |                            |              |
|--------------------------|----------------------------|--------------|
| the General Practitioner | the internist/nephrologist | I don't know |
|                          |                            |              |

4.2) There has been contact between the General Practitioner and the internist/nephrologist since my referral back to the General Practitioner.

|                                                                                          |                                                               |                                                                                 |                                                   |
|------------------------------------------------------------------------------------------|---------------------------------------------------------------|---------------------------------------------------------------------------------|---------------------------------------------------|
| There has been <u>no contact</u> between my General Practitioner and the hospital doctor | My General Practitioner has <u>called</u> the hospital doctor | My General Practitioner has had <u>digital contact</u> with the hospital doctor | I <u>don't know</u> if there has been any contact |
|                                                                                          |                                                               |                                                                                 |                                                   |

4.3) I was happy with the collaboration between the General Practitioner and nephrologist.

|                   |          |                            |       |                |              |
|-------------------|----------|----------------------------|-------|----------------|--------------|
| Strongly disagree | Disagree | Neither agree nor disagree | Agree | Strongly agree | I don't know |
|                   |          |                            |       |                |              |

Can you name at least one aspect you were satisfied with?

.....  
 .....

Can you name at least one point for improvement?

.....  
 .....

4.4) I have other comments or points for improvement concerning the collaboration between the General Practitioner and nephrologist/internist.

| Yes | No |
|-----|----|
|     |    |

If you answered yes, please share your comments or points for improvement below.

.....  
 .....

**5) Confidence in quality of care by the General Practitioner**

**This part of the questionnaire is about your confidence in the quality of care provided by the General Practitioner regarding your kidney disease. Please tick the answer that is most relevant to you.**

5.1) I have confidence in the quality of care provided by the General Practitioner regarding my kidney disease.

|                   |          |                            |       |                |
|-------------------|----------|----------------------------|-------|----------------|
| Strongly disagree | Disagree | Neither agree nor disagree | Agree | Strongly agree |
|-------------------|----------|----------------------------|-------|----------------|

|  |  |  |  |  |
|--|--|--|--|--|
|  |  |  |  |  |
|--|--|--|--|--|

Can you name at least one reason why you are (/not) confident in this?

.....  
.....

Can you name at least one point of improvement that would increase your confidence?

.....  
.....

5.2) I have other comments or points for improvement for the General Practitioner concerning the confidence in the quality of care regarding my kidney disease.

| Yes | No |
|-----|----|
|     |    |

If you answered yes, please share your comments or points for improvement below.

.....  
.....

**6) Other comments**

**This part of the questionnaire can be filled in voluntarily if you have any other comments or points for improvement for the General Practitioner nephrologist/internist or for the study generally.**

6.1) I have other comments or points for improvement that have not been addressed in the questionnaire yet.

| Yes | No |
|-----|----|
|     |    |



### Questionnaire for doctors

Patient study number:

|  |
|--|
|  |
|--|

#### 1) Transfer from the nephrologist

Please tick the applicable fields.

1.1) Have you read the transfer letter from the nephrologist?

| Yes | No |
|-----|----|
|     |    |

If you answered no, what is the reason that you have not read the letter?

.....

1.2) Was the information in the letter from the nephrologist clear?

| Yes | No |
|-----|----|
|     |    |

If you answered no, what information was unclear?

.....

.....

1.3) Did you actively monitor the patient's compliance with the agreements made regarding the check-ups?

| Yes | No |
|-----|----|
|     |    |

If you answered yes, how did you do this?

.....

If you answered no, what were your considerations for not doing so?

.....

## Questionnaire for doctors

1.4) Did you approach the patient for the check-ups or did the patient approach you?

|                          |                           |                 |
|--------------------------|---------------------------|-----------------|
| I approached the patient | The patient approached me | I do not recall |
|                          |                           |                 |

1.5) Have you recorded a 'U99.1 Renal Insufficiency' issue in the patient's medical history?

|                                  |                                     |
|----------------------------------|-------------------------------------|
| Yes, the issue has been recorded | No, the issue has not been recorded |
|                                  |                                     |

If you answered no, what were your considerations?

.....

.....

## 2) Care for the patient

Please tick the applicable fields.

2.1) Who checked the patient after being referred back by the nephrologist? (multiple answers possible)

|    |                |              |        |
|----|----------------|--------------|--------|
| GP | Practice nurse | Someone else | No one |
|    |                |              |        |

What were your considerations regarding the division of care responsibilities in your practice with this patient?

.....

.....



## Questionnaire for doctors

2.2) Did you carry out the check-ups as advised by the nephrologist?

| Yes | No |
|-----|----|
|     |    |

If you answered no, what were your considerations for deviating from that advice?

.....

.....

2.3) Do you feel that you have sufficient knowledge and experience to take responsibility for this patient's care?

| Yes | No |
|-----|----|
|     |    |

If you answered no, what would help you?

.....

.....

2.4) How onerous did you find taking over the care for this patient?

| Not onerous at all | Somewhat onerous | onerous | Very onerous |
|--------------------|------------------|---------|--------------|
|                    |                  |         |              |

Can you name at least one reason why you find the takeover of care stressful?

.....

.....

2.5) Other than a good transfer letter, is there anything else that you need in your practice to monitor and treat patients with severe kidney disease? (e.g. knowledge and education, improvement of guidelines, peer review, etc.)

| Yes | No |
|-----|----|
|     |    |

If you answered yes, what do you need?

.....

.....

### 3) Use of Telenephrology

Please tick the applicable fields.

3.1) Did you use Telenephrology during the study period of the patient?

| Yes | No |
|-----|----|
|     |    |

If you answered yes, which questions did you have?

.....

.....

3.2) (if applicable) Are adjustments to Telenephrology (the programme itself or the logistics) necessary for improving telephone consultations with the nephrologist?

| Yes | No |
|-----|----|
|     |    |

If you answered yes, do you have any suggestions?

.....

.....  
**4) Use of the kidney passport**

Please tick the applicable fields.

4.1) Did you fill in the kidney passport together with the patient?

| Yes                      | No                       |
|--------------------------|--------------------------|
| <input type="checkbox"/> | <input type="checkbox"/> |

If you answered no, what were your considerations for not doing so?

.....  
.....

If you answered yes, what is your opinion about the use of the kidney passport in the practice, and do you have any suggestions for improvement?

.....  
.....

**5. Latest patient check-ups**

Finally, we would very much appreciate it if you could send the patient's latest test results, change in medication and comorbidity along with the survey (can also be submitted as a printout from the GP information system).

|     | Lab results                                                                                    | Unit                         | Date | Results |
|-----|------------------------------------------------------------------------------------------------|------------------------------|------|---------|
| 1.  | Creatinine                                                                                     | mmol/L                       |      |         |
| 2.  | CKD-EPI                                                                                        | ml/min/<br>1.73 <sup>2</sup> |      |         |
| 3.  | CKD-EPI (other values measured by you since being referred back)                               | ml/min/<br>1.73 <sup>2</sup> |      |         |
| 4.  | CKD-EPI (other values measured by you since being referred back)                               | ml/min/<br>1.73 <sup>2</sup> |      |         |
| 5.  | CKD-EPI (other values measured by you since being referred back)                               | ml/min/<br>1.73 <sup>2</sup> |      |         |
| 6.  | Albumine-creatinine ratio urine                                                                | mmol/L                       |      |         |
| 7.  | Albumine-creatinine ratio urine                                                                | mg/L                         |      |         |
| 8.  | Potassium                                                                                      | mmol/L                       |      |         |
| 9.  | Phosphate                                                                                      | mmol/L                       |      |         |
| 10. | Calcium                                                                                        | mmol/L                       |      |         |
| 11. | Haemoglobin                                                                                    | mmol/L                       |      |         |
| 12. | Systolic blood pressure                                                                        | mmHg                         |      |         |
| 13. | Diastolic blood pressure                                                                       | mmHg                         |      |         |
|     | Medication use                                                                                 | Voluntary to fill in:        |      |         |
| 14. | Which of this patient's medication was <u>stopped</u> over the course of the study (one year)? |                              |      |         |
| 15. | Which of this patient's medication was <u>started</u> over the course of the study (one year)? |                              |      |         |

**Many thanks for filling in the questionnaire!**

Supplementary Table S1: nephrological outcomes and QoC after one year of follow-up in primary care (T1)

| Part. number | Stable kidney function † | Stable albuminuria‡ | Stable blood pressure‡ | Stable metabolic parameters‡ | Medication changes                                                                                                | Monitoring frequency executed (advised) | Treatment by GP or nephrologist | Specific circumstances                                                                                                                                                                                                  |
|--------------|--------------------------|---------------------|------------------------|------------------------------|-------------------------------------------------------------------------------------------------------------------|-----------------------------------------|---------------------------------|-------------------------------------------------------------------------------------------------------------------------------------------------------------------------------------------------------------------------|
| 1            | Yes                      | Yes                 | Not measured           | Yes                          | No                                                                                                                | 4 (4)                                   | GP                              | After the study, two outpatient visits on patients' request. No recent blood pressure measurement in medical record GP                                                                                                  |
| 2            | Yes                      | Not measured        | Yes                    | Yes                          | No                                                                                                                | 1 (4)                                   | GP                              | Patient refused blood testing because of COVID-19 and died because of COVID-19 one and a half years after inclusion in the study                                                                                        |
| 3            | Yes                      | Yes                 | Yes                    | Yes                          | Start furosemide                                                                                                  | 1 (4)                                   | GP                              |                                                                                                                                                                                                                         |
| 4            | Yes                      | Yes                 | Yes                    | Yes                          | Start amlodipine and apixaban. Increase of metoprolol dose. Stop acenocoumarol, lisinopril, barnidipin and ascal. | 1 (4)                                   | GP                              | Many hospital admissions, therefore, adjustment of monitor frequency by the GP. AKI <sup>§</sup> because of low blood pressure just after study period, patient was sent to the nephrologist by the GP. eGFR recovered. |
| 5            | Yes                      | Yes                 | Yes                    | Yes                          | No                                                                                                                | 4 (4)                                   | GP                              |                                                                                                                                                                                                                         |
| 6            | Yes                      | Yes                 | Yes                    | Yes                          | Start oxycodone                                                                                                   | 4 (4)                                   | GP                              |                                                                                                                                                                                                                         |
| 7            | Yes                      | Yes                 | Yes                    | Yes                          | Start dutasteride                                                                                                 | 4 (4)                                   | GP                              |                                                                                                                                                                                                                         |
| 8            | Yes                      | Yes                 | Yes                    | Yes                          | Missing                                                                                                           | 4 (4)                                   | GP                              | Many hospital admissions. According to the GP, also had monitoring by other specialists. Upon inquiry regarding medication changes, patient died recently                                                               |

|                                                                                                                                                                      |              |              |              |              |                               |             |    |                                                                                         |
|----------------------------------------------------------------------------------------------------------------------------------------------------------------------|--------------|--------------|--------------|--------------|-------------------------------|-------------|----|-----------------------------------------------------------------------------------------|
|                                                                                                                                                                      |              |              |              |              |                               |             |    | (two years after back referral) due to multifactorial cause.                            |
| <b>9</b>                                                                                                                                                             | Missing      | Missing      | Missing      | Missing      | Missing                       | Missing (4) | GP | GP not responding                                                                       |
| <b>10</b>                                                                                                                                                            | Yes          | Yes          | Yes          | Yes          | No                            | 4 (4)       | GP |                                                                                         |
| <b>11</b>                                                                                                                                                            | Yes          | Yes          | Yes          | Yes          | No                            | 2 (4)       | GP |                                                                                         |
| <b>12</b>                                                                                                                                                            | Yes          | Yes          | Yes          | Yes          | Stop amlodipine               | 4 (4)       | GP |                                                                                         |
| <b>13</b>                                                                                                                                                            | Yes          | Yes          | Yes          | Yes          | No                            | 3 (4)       | GP |                                                                                         |
| <b>14</b>                                                                                                                                                            | Not measured | Not measured | Not measured | Not measured | Not measured                  | 0 (4)       | GP | Transfer of care missed by GP, no monitoring. Patient is not responding to our letters. |
| <b>15</b>                                                                                                                                                            | Yes          | Yes          | No           | Yes          | Start hydrochlorothiazide     | 4 (4)       | GP | Bad compliance of patient according to GP.                                              |
| <b>16</b>                                                                                                                                                            | Yes          | Yes          | Yes          | Yes          | No                            | 4 (4)       | GP |                                                                                         |
| <b>17</b>                                                                                                                                                            | Yes          | Yes          | Yes          | Yes          | Stop ascal. start clopidogrel | 4 (4)       | GP |                                                                                         |
| <b>18</b>                                                                                                                                                            | Yes          | Yes          | No           | Yes          | No                            | 4 (4)       | GP | No medications changes yet.                                                             |
| <p>‡ For definitions of stable kidney function, albuminuria, blood pressure and metabolic parameters: see the Methods section</p> <p>‡ AKI : Acute Kidney Injury</p> |              |              |              |              |                               |             |    |                                                                                         |

| Supplementary Table S2: nominal results of the questionnaires completed by patients (N=13) |     |    |         |                   |          |         |       |                |
|--------------------------------------------------------------------------------------------|-----|----|---------|-------------------|----------|---------|-------|----------------|
|                                                                                            | Yes | No | Unknown | Strongly disagree | Disagree | Neutral | Agree | Strongly agree |
| <b>Information provision</b>                                                               |     |    |         |                   |          |         |       |                |
| Information about the cause was clear                                                      |     |    |         | 2                 | 1        | 0       | 5     | 5              |
| Information about the treatment was clear                                                  |     |    |         | 1                 | 0        | 1       | 5     | 6              |
| I am informed about the tasks of the GP                                                    |     |    |         | 0                 | 1        | 1       | 8     | 3              |
| <b>Use of the kidney passport</b>                                                          |     |    |         |                   |          |         |       |                |
| I read the kidney passport                                                                 | 9   | 4  |         |                   |          |         |       |                |
| I used of kidney passport                                                                  | 9   | 4  |         |                   |          |         |       |                |
| The kidney passport is a useful aid                                                        |     |    | 2       | 0                 | 0        | 4       | 3     | 4              |
| <b>Monitoring by the GP</b>                                                                |     |    |         |                   |          |         |       |                |
| Monitoring as requested by the nephrologist                                                | 8   | 5  |         |                   |          |         |       |                |
| I had to remind the GP of the check-ups                                                    | 8   | 5  |         |                   |          |         |       |                |
| My CKD is now monitored by the GP                                                          | 10  | 1  | 2       |                   |          |         |       |                |
| I have confidence in quality of care by the GP                                             |     |    | 1       | 0                 | 1        | 3       | 7     | 1              |
| <b>Collaboration of GP and nephrologist</b>                                                |     |    |         |                   |          |         |       |                |
| There was contact between GP and nephrologist since back referral                          | 4   | 1  | 8       |                   |          |         |       |                |
| The collaboration between GP and nephrologist was sufficient                               |     |    | 10      | 0                 | 0        | 2       | 1     | 0              |

| Supplementary Table S3: nominal results of the questionnaires completed by GPs (N=17) |     |    |          |             |                  |         |              |
|---------------------------------------------------------------------------------------|-----|----|----------|-------------|------------------|---------|--------------|
|                                                                                       | Yes | No | Un-known | Not onerous | Somewhat onerous | Onerous | Very onerous |
| <b>Information provision</b>                                                          |     |    |          |             |                  |         |              |
| I read the transfer letter after back referral                                        | 15  | 2  |          |             |                  |         |              |
| Information of the transfer letter was clear                                          | 14  | 3  |          |             |                  |         |              |
| <b>Organisation of care</b>                                                           |     |    |          |             |                  |         |              |
| I actively monitored the patient's compliance                                         | 10  | 7  |          |             |                  |         |              |
| The GP approached the patient for check-ups                                           | 9   | 2  | 6        |             |                  |         |              |
| The patient has been seen by the GP                                                   | 13  | 4  |          |             |                  |         |              |
| The patient has been seen by the practice nurse?                                      | 9   | 8  |          |             |                  |         |              |
| There is an ICPC code in patients' medical record                                     | 17  | 0  |          |             |                  |         |              |
| <b>Knowledge and follow-up</b>                                                        |     |    |          |             |                  |         |              |
| Check-ups as advised by the nephrologist                                              | 11  | 6  |          |             |                  |         |              |
| I have sufficient knowledge to take responsibility for CKD care                       | 15  | 2  |          |             |                  |         |              |
| CKD care is onerous                                                                   |     |    |          | 7           | 6                | 3       | 1            |
| I need for more support besides a transfer letter                                     | 11  | 6  |          |             |                  |         |              |
| <b>Use of tools</b>                                                                   |     |    |          |             |                  |         |              |
| I used Telenephrology                                                                 | 9   | 8  |          |             |                  |         |              |
| I used the Kidney passport                                                            | 6   | 11 |          |             |                  |         |              |
